# Supplementary material
Source: PubMed Central journal article supplement (PMC7779743)
Supplement: NIHMS1610215-supplement-1.pdf [file NIHMS1610215-supplement-1.pdf]

**SUPPLEMENTARY TABLE 1.** Broad and specific definitions for AHP-like symptoms.

|                                                                                                                                                                                                |                                                                                                                                                                                                                                                                                                                                                                                                                                                                                                                                                                                                                                                                                                                      |
|------------------------------------------------------------------------------------------------------------------------------------------------------------------------------------------------|----------------------------------------------------------------------------------------------------------------------------------------------------------------------------------------------------------------------------------------------------------------------------------------------------------------------------------------------------------------------------------------------------------------------------------------------------------------------------------------------------------------------------------------------------------------------------------------------------------------------------------------------------------------------------------------------------------------------|
| Broad definition for AHP-like symptoms                                                                                                                                                         | <p>≥2 episodes of excruciating abdominal pain that lasted more than one day and required seeking urgent medical care</p> <p style="text-align: center;">AND</p> <p>≥2 of the following concomitant symptoms <sup>a</sup>:</p> <ul style="list-style-type: none"><li>• urine color change to dark red or brown</li><li>• skin blisters on sun-exposed areas</li><li>• peripheral nervous system manifestations (muscle weakness, pain or numbness in extremities or back)</li><li>• central nervous system manifestations (anxiety, confusion, depression, hallucinations, insomnia, seizures)</li><li>• autonomic nervous system manifestations (constipation, hypertension, nausea/vomiting, tachycardia)</li></ul> |
| Specific definition for AHP-like symptoms                                                                                                                                                      | <p>≥2 episodes of excruciating abdominal pain that lasted more than one day and required seeking urgent medical care</p> <p style="text-align: center;">AND</p> <p>≥2 of the following concomitant symptoms <sup>a</sup>:</p> <ul style="list-style-type: none"><li>• urine color change to dark red or brown</li><li>• skin blisters on sun-exposed areas</li><li>• peripheral nervous system manifestations (muscle weakness, pain or numbness in extremities or back)</li><li>• central nervous system manifestations (confusion, hallucinations, seizures)</li></ul>                                                                                                                                             |
| <p>a: These were assessed for by asking respondents: “Thinking back to when you had excruciating belly pain, did you experience any of the following symptoms at or around the same time?”</p> |                                                                                                                                                                                                                                                                                                                                                                                                                                                                                                                                                                                                                                                                                                                      |

**SUPPLEMENTARY TABLE 2.** Study population demographics compared with the U.S. population.

| Variable                               | Study cohort<br>(N=10,300) | 2018 U.S.<br>population |
|----------------------------------------|----------------------------|-------------------------|
| Age (years) <sup>a</sup> :             |                            |                         |
| 18 to 25                               | 1,343 (13.0%)              | 11.5%                   |
| 26 to 34                               | 1,650 (16.0%)              | 16.3%                   |
| 35 to 54                               | 4,176 (40.5%)              | 33.8%                   |
| 55 to 64                               | 1,629 (15.8%)              | 17.3%                   |
| ≥65                                    | 1,502 (14.6%)              | 21.1%                   |
| Sex:                                   |                            |                         |
| Male                                   | 4,252 (41.3%)              | 49.2%                   |
| Female                                 | 6,019 (58.4%)              | 50.8%                   |
| Other                                  | 29 (0.3%)                  | –                       |
| Race/ethnicity:                        |                            |                         |
| Non-Hispanic white                     | 7,877 (76.5%)              | 60.2%                   |
| Non-Hispanic black                     | 765 (7.4%)                 | 12.3%                   |
| Latino                                 | 873 (8.5%)                 | 18.3%                   |
| Non-Hispanic Asian                     | 310 (3.0%)                 | 5.6%                    |
| Other                                  | 475 (4.6%)                 | 3.6%                    |
| Marital status <sup>b</sup> :          |                            |                         |
| Married or in a long-term relationship | 6,256 (60.7%)              | 47.8%                   |
| Not married                            | 4,044 (39.3%)              | 52.2%                   |
| Educational attainment <sup>c</sup> :  |                            |                         |
| High school degree or less             | 2,235 (21.7%)              | 38.6%                   |
| Some college                           | 3,408 (33.1%)              | 20.3%                   |
| College degree                         | 3,398 (33.0%)              | 28.6%                   |
| Advanced graduate degree               | 1,259 (12.2%)              | 12.6%                   |
| Employment status <sup>d</sup> :       |                            |                         |
| Not employed                           | 4,311 (41.9%)              | 40.2%                   |
| Employed or full-time student          | 5,989 (58.2%)              | 59.8%                   |
| Total household income:                |                            |                         |
| \$0 to 50,000                          | 4,988 (48.4%)              | 40.9%                   |
| \$50,001 to 100,000                    | 3,319 (32.2%)              | 30.0%                   |
| \$100,001 to 200,000                   | 1,356 (13.2%)              | 21.6%                   |
| ≥\$200,001                             | 180 (1.8%)                 | 7.6%                    |
| Prefer not to say                      | 457 (4.4%)                 | –                       |

|                      |               |       |
|----------------------|---------------|-------|
| U.S. region:         |               |       |
| Northeast            | 2,255 (21.9%) | 17.2% |
| South                | 3,877 (37.6%) | 38.1% |
| Midwest              | 1,843 (17.9%) | 20.9% |
| West                 | 2,325 (22.6%) | 23.8% |
| Has health insurance | 9,265 (90.0%) | 91.1% |

Data are presented as n (%) or %.

U.S. population data estimates are from the 2018 U.S. Census American Community Survey (<https://data.census.gov/>) or Kaiser Family Foundation (<https://www.kff.org/state-category/demographics-and-the-economy/population/>). Data were accessed on February 20, 2020.

a: The Kaiser Family Foundation reports data for those aged 19–25 years instead of 18–25 years. The U.S. population data estimates for all age groups were also recalculated with the denominator being all adults  $\geq 19$  years of age; b: the U.S. population data are calculated among those  $\geq 15$  years old and the 2018 U.S. Census American Community Survey does not report data for those in a long-term relationship; c: the U.S. population data are calculated among those  $\geq 25$  years old; d: for the study cohort, the not employed category includes those who reported being unemployed, unable to work owing to a disability, on leave of absence from work, retired or a homemaker; for the U.S. population data, we report the employment/population ratio which is the portion of the noninstitutionalized population that is employed among those  $\geq 16$  years old.

Journal

**SUPPLEMENTARY TABLE 3.** Physician-diagnosed conditions reported by respondents that affect the gastrointestinal tract or are commonly associated with gastrointestinal disorders (N=10,300).

| Variable                                                    | n (%)         |
|-------------------------------------------------------------|---------------|
| Number of conditions—overall cohort (N=10,300):             |               |
| 0                                                           | 5,495 (53.4%) |
| 1                                                           | 2,731 (26.5%) |
| 2                                                           | 1,216 (11.8%) |
| ≥3                                                          | 858 (8.3%)    |
| Individual condition—overall cohort (N=10,300):             |               |
| Gastroesophageal reflux disease                             | 1,892 (18.4%) |
| Diabetes                                                    | 1,127 (10.9%) |
| Gallstones                                                  | 997 (9.7%)    |
| Irritable bowel syndrome with diarrhea                      | 631 (6.1%)    |
| Fibromyalgia                                                | 626 (6.1%)    |
| Chronic idiopathic constipation                             | 574 (5.6%)    |
| Irritable bowel syndrome with constipation                  | 564 (5.5%)    |
| Peptic ulcer disease                                        | 491 (4.8%)    |
| Mixed irritable bowel syndrome                              | 336 (3.3%)    |
| Pancreatitis                                                | 270 (2.6%)    |
| Ulcerative colitis                                          | 253 (2.5%)    |
| Crohn’s disease                                             | 185 (1.8%)    |
| Celiac disease                                              | 164 (1.6%)    |
| Cirrhosis                                                   | 128 (1.2%)    |
| HIV/AIDS                                                    | 72 (0.7%)     |
| Individual condition—those with only 1 condition (n=2,731): |               |
| Gastroesophageal reflux disease                             | 655 (24.0%)   |
| Diabetes                                                    | 478 (17.5%)   |
| Gallstones                                                  | 322 (11.8%)   |
| Irritable bowel syndrome with diarrhea                      | 273 (10.0%)   |
| Irritable bowel syndrome with constipation                  | 204 (7.5%)    |
| Chronic idiopathic constipation                             | 137 (5.0%)    |
| Fibromyalgia                                                | 132 (4.8%)    |
| Peptic ulcer disease                                        | 130 (4.8%)    |
| Mixed irritable bowel syndrome                              | 102 (3.7%)    |
| Ulcerative colitis                                          | 84 (3.1%)     |
| Pancreatitis                                                | 59 (2.2%)     |
| Celiac disease                                              | 54 (2.0%)     |

|                                                              |             |
|--------------------------------------------------------------|-------------|
| Crohn's disease                                              | 51 (1.9%)   |
| HIV/AIDS                                                     | 27 (1.0%)   |
| Cirrhosis                                                    | 23 (0.8%)   |
| Individual condition—those with only 2 conditions (n=1,216): |             |
| Gastroesophageal reflux disease                              | 612 (50.3%) |
| Gallstones                                                   | 322 (26.5%) |
| Diabetes                                                     | 316 (26.0%) |
| Irritable bowel syndrome with diarrhea                       | 186 (15.3%) |
| Chronic idiopathic constipation                              | 177 (14.6%) |
| Fibromyalgia                                                 | 170 (14.0%) |
| Irritable bowel syndrome with constipation                   | 165 (13.6%) |
| Peptic ulcer disease                                         | 136 (11.2%) |
| Mixed irritable bowel syndrome                               | 85 (7.0%)   |
| Pancreatitis                                                 | 70 (5.8%)   |
| Ulcerative colitis                                           | 59 (4.9%)   |
| Crohn's disease                                              | 49 (4.0%)   |
| Cirrhosis                                                    | 37 (3.0%)   |
| Celiac disease                                               | 33 (2.7%)   |
| HIV/AIDS                                                     | 15 (1.2%)   |
| Individual condition—those with only ≥3 conditions (n=858):  |             |
| Gastroesophageal reflux disease                              | 625 (72.8%) |
| Gallstones                                                   | 353 (41.1%) |
| Diabetes                                                     | 333 (38.8%) |
| Fibromyalgia                                                 | 324 (37.8%) |
| Chronic idiopathic constipation                              | 260 (30.3%) |
| Peptic ulcer disease                                         | 225 (26.2%) |
| Irritable bowel syndrome with constipation                   | 195 (22.7%) |
| Irritable bowel syndrome with diarrhea                       | 172 (20.1%) |
| Mixed irritable bowel syndrome                               | 149 (17.4%) |
| Pancreatitis                                                 | 141 (16.4%) |
| Ulcerative colitis                                           | 110 (12.8%) |
| Crohn's disease                                              | 85 (9.9%)   |
| Celiac disease                                               | 77 (9.0%)   |
| Cirrhosis                                                    | 68 (7.9%)   |
| HIV/AIDS                                                     | 30 (3.5%)   |

**SUPPLEMENTARY TABLE 4.** Demographics of those with AHP-like symptoms.

| <b>Variable</b>                        | <b>AHP-like symptoms:<br/>broad definition <sup>a</sup><br/>(n=2,413)</b> | <b>AHP-like symptoms:<br/>specific definition <sup>b</sup><br/>(n=734)</b> |
|----------------------------------------|---------------------------------------------------------------------------|----------------------------------------------------------------------------|
| Age (years):                           |                                                                           |                                                                            |
| 18 to 29                               | 545 (22.6%)                                                               | 210 (28.6%)                                                                |
| 30 to 39                               | 594 (24.6%)                                                               | 219 (29.8%)                                                                |
| 40 to 49                               | 562 (23.3%)                                                               | 157 (21.4%)                                                                |
| 50 to 59                               | 404 (16.7%)                                                               | 113 (15.4%)                                                                |
| ≥60                                    | 308 (12.8%)                                                               | 35 (4.8%)                                                                  |
| Sex:                                   |                                                                           |                                                                            |
| Male                                   | 945 (39.2%)                                                               | 370 (50.4%)                                                                |
| Female                                 | 1,461 (60.6%)                                                             | 360 (49.1%)                                                                |
| Other                                  | 7 (0.3%)                                                                  | 4 (0.5%)                                                                   |
| Race/ethnicity:                        |                                                                           |                                                                            |
| Non-Hispanic white                     | 1,715 (71.1%)                                                             | 496 (67.6%)                                                                |
| Non-Hispanic black                     | 217 (9.0%)                                                                | 71 (9.7%)                                                                  |
| Latino                                 | 282 (11.7%)                                                               | 95 (12.9%)                                                                 |
| Non-Hispanic Asian                     | 45 (1.9%)                                                                 | 18 (2.5%)                                                                  |
| Other                                  | 154 (6.4%)                                                                | 54 (7.4%)                                                                  |
| Marital status:                        |                                                                           |                                                                            |
| Married or in a long-term relationship | 1,483 (61.5%)                                                             | 456 (62.1%)                                                                |
| Not married                            | 930 (38.5%)                                                               | 278 (37.9%)                                                                |
| Educational attainment:                |                                                                           |                                                                            |
| High school degree or less             | 621 (25.7%)                                                               | 182 (24.8%)                                                                |
| Some college                           | 851 (35.3%)                                                               | 250 (34.1%)                                                                |
| College degree                         | 712 (29.5%)                                                               | 222 (30.3%)                                                                |
| Advanced graduate degree               | 229 (9.5%)                                                                | 80 (10.9%)                                                                 |

|                                                     |               |             |
|-----------------------------------------------------|---------------|-------------|
| Employment status:                                  |               |             |
| Not employed <sup>c</sup>                           | 1,059 (43.9%) | 291 (39.7%) |
| Employed or full-time student                       | 1,354 (56.1%) | 443 (60.4%) |
| Total household income:                             |               |             |
| \$0 to 50,000                                       | 1,314 (54.5%) | 381 (51.9%) |
| \$50,001 to 100,000                                 | 723 (30.0%)   | 234 (31.9%) |
| \$100,001 to 200,000                                | 261 (10.8%)   | 87 (11.9%)  |
| ≥\$200,001                                          | 40 (1.7%)     | 17 (2.3%)   |
| Prefer not to say                                   | 75 (3.1%)     | 15 (2.0%)   |
| U.S. region:                                        |               |             |
| Northeast                                           | 518 (21.5%)   | 144 (19.6%) |
| South                                               | 993 (41.2%)   | 292 (39.8%) |
| Midwest                                             | 371 (15.4%)   | 126 (17.2%) |
| West                                                | 531 (22.0%)   | 172 (23.4%) |
| Has health insurance                                | 2,196 (91.0%) | 665 (90.6%) |
| Has usual source of care                            | 2,123 (88.0%) | 642 (87.5%) |
| Has comorbidity that affects GI tract <sup>d</sup>  | 1,693 (70.2%) | 540 (73.6%) |
| Abdominal pain locus of control (0-5) <sup>e</sup>  | 3.2 (0.9)     | 3.5 (0.8)   |
| Abdominal pain PROMIS percentile score <sup>f</sup> | 50.0 (34.7)   | 64.8 (30.9) |
| Physical global health PROMIS T-score <sup>g</sup>  | 40.9 (7.9)    | 39.0 (7.4)  |
| Mental global health PROMIS T-score <sup>g</sup>    | 43.1 (9.3)    | 42.1 (9.5)  |

Data are presented as n (%) or mean (standard deviation).

a: Includes those with ≥2 episodes of excruciating abdominal pain along with ≥2 of the following concomitant symptoms: urine color change, skin blisters, and peripheral (muscle weakness, pain or numbness in arms, legs, or back), central (anxiety, confusion, depression, hallucinations, insomnia, seizures), and autonomic (constipation, hypertension, nausea/vomiting, tachycardia) nervous system manifestations; b: includes ≥2 episodes of excruciating abdominal pain along with ≥2 of the following concomitant symptoms: urine color change, skin blisters, and peripheral (muscle weakness, pain or numbness in arms, legs, or back) and central (confusion, hallucinations, seizures) nervous system manifestations; c: includes those who reported being unemployed, unable to work owing to a disability, on leave of absence from work, retired, or a homemaker; d:

see Supplementary Table 3 for list of associated physician-diagnosed conditions; e: locus of control measures the extent to which individuals believe they can control events that affect them—higher score corresponds to lower perceived control of events that affect their abdominal pain; f: higher score corresponds to more severe symptoms with 50 being the median among all individuals with abdominal pain; g: higher score corresponds to better health.

Journal Pre-proof
